# Supplementary material
Source: PubMed Central journal article supplement (PMC4407365)

Supplementary Figure 1, Cohen *et al.*

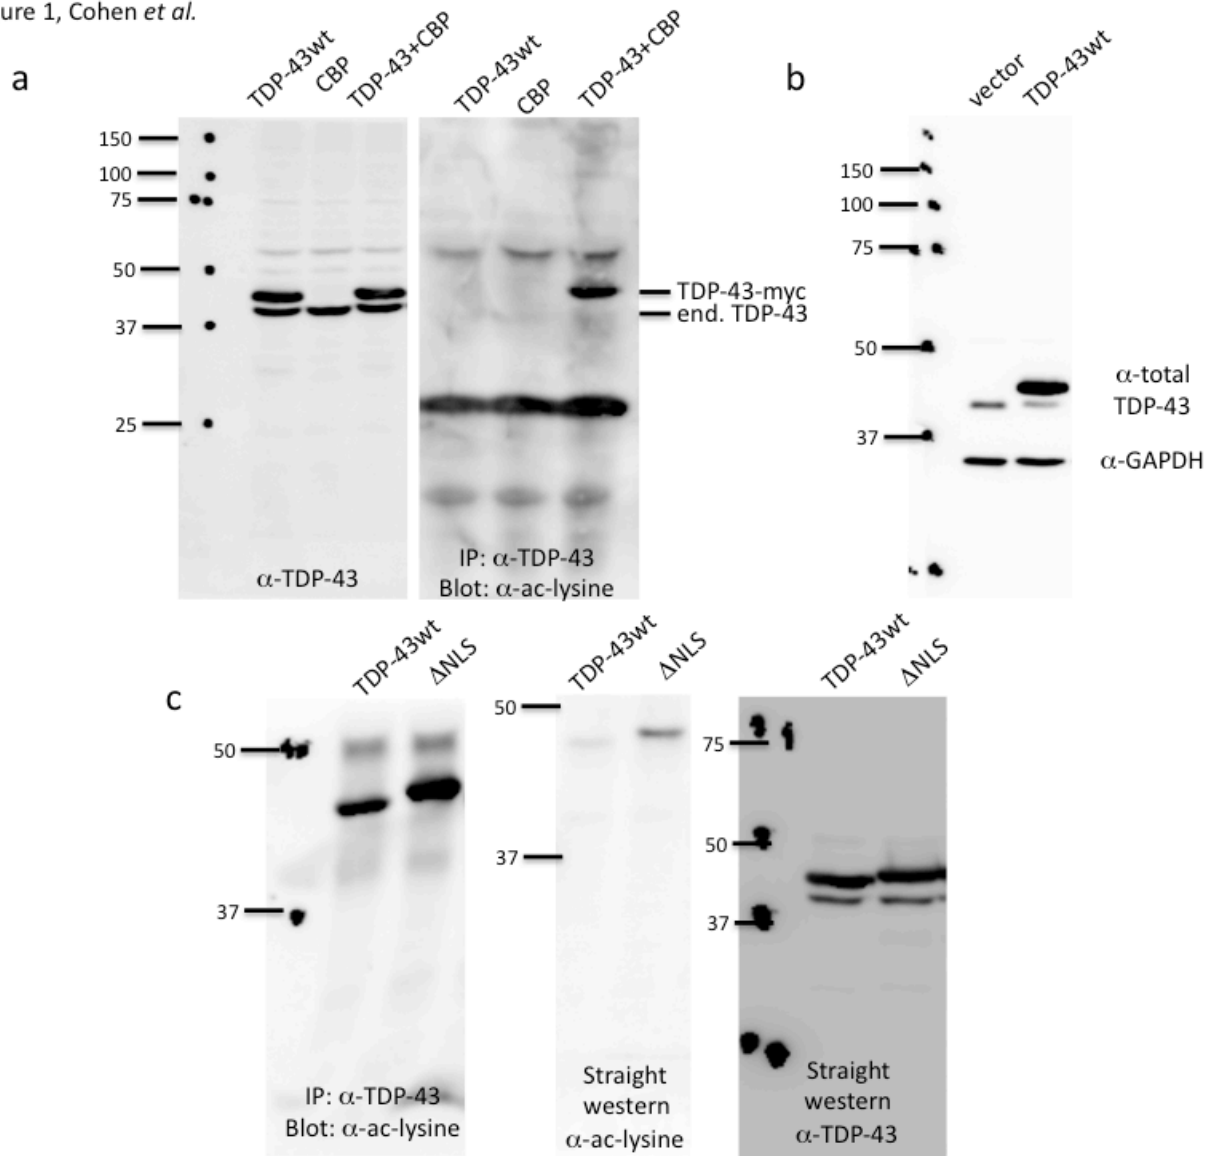

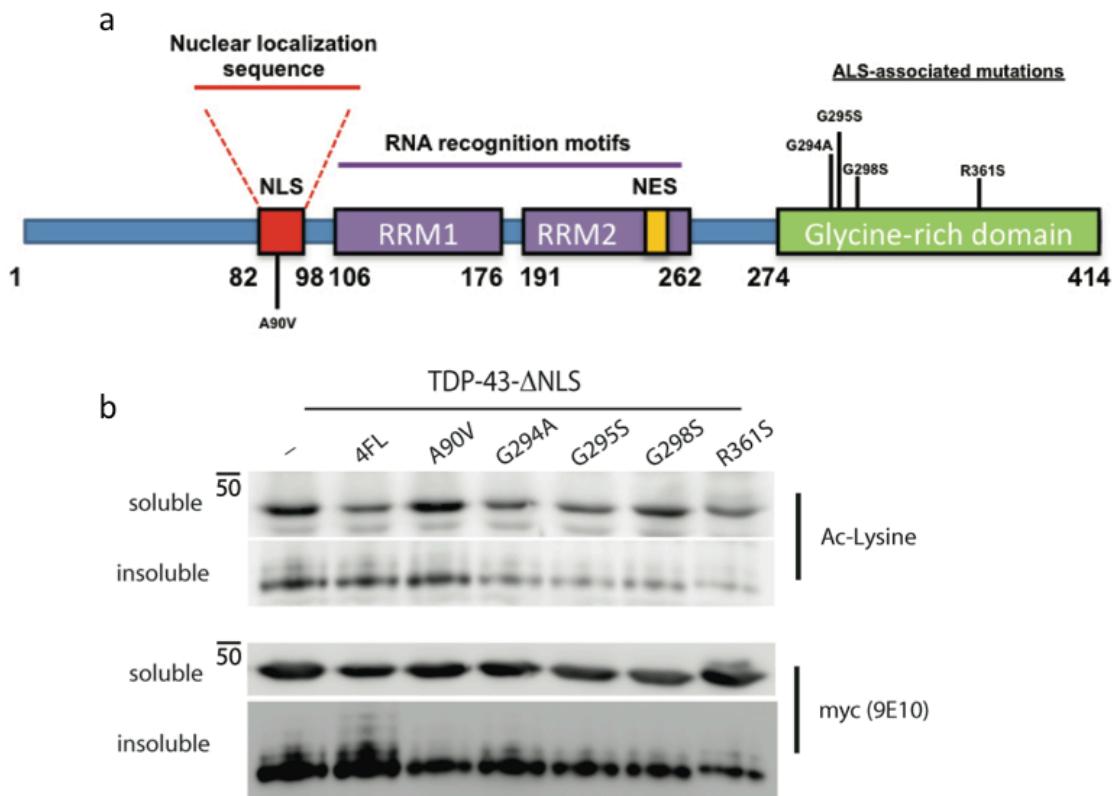

### Supplementary Figure 2: TDP-43 acetylation of a panel of ALS-associated TARDBP mutations

a) A schematic of the TDP-43 protein depicting the nuclear localization sequence (NLS), RNA-recognition motifs (RRMs), and C-terminal glycine-rich domain harboring the majority of the ALS-associated genetic mutations. b) Cells were co-transfected with Creb-binding protein (CBP) and the following cytoplasmic targeted expression plasmids: unmodified TDP-43-ΔNLS (positive control for acetylation), TDP-43-ΔNLS containing ALS-associated mutations (A90V, G294A, G295S, G298S, R361S), or TDP-43-ΔNLS containing 4FL RNA-binding deficient mutations in RRM1 and RRM2 (F147/149/229/231L). Cell lysates were evaluated by immunoprecipitation and western analysis using an anti-acetyl-lysine antibody. There were no appreciable differences in TDP-43 acetylation status among the various mutants compared to TDP-43-ΔNLS.

Supplementary Figure 3, Cohen *et al.*

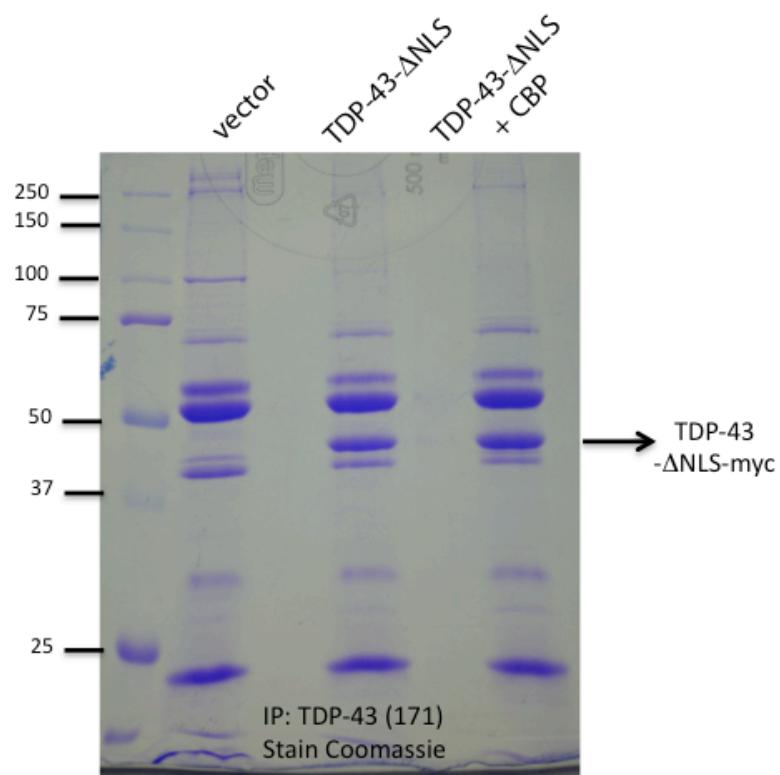

Supplementary Figure 4, Cohen *et al.*

| #  | b              | b-H <sub>2</sub> O | b-NH <sub>3</sub> | b (2+) | Seq       | y              | y-H <sub>2</sub> O | y-NH <sub>3</sub> | y (2+) | #  |
|----|----------------|--------------------|-------------------|--------|-----------|----------------|--------------------|-------------------|--------|----|
| 1  | 102.06         | 84.04              | 85.03             | 51.53  | T         |                |                    |                   |        | 11 |
| 2  | 159.08         | 141.07             | 142.05            | 80.04  | G         | 1133.58        | <b>1115.72</b>     | 1116.56           | 567.29 | 10 |
| 3  | <b>296.24</b>  | <b>278.12</b>      | <b>279.35</b>     | 148.57 | H         | <b>1076.92</b> | 1058.55            | 1059.54           | 538.78 | 9  |
| 4  | 383.34         | 365.29             | 366.38            | 192.08 | S         | 939.59         | <b>921.38</b>      | 922.48            | 470.25 | 8  |
| 5  | <b>553.39</b>  | <b>535.33</b>      | <b>536.25</b>     | 277.14 | K(+42.01) | <b>852.61</b>  | <b>834.16</b>      | 835.45            | 426.74 | 7  |
| 6  | 610.29         | 592.28             | <b>593.24</b>     | 305.65 | G         | <b>682.46</b>  | <b>664.02</b>      | <b>665.65</b>     | 341.68 | 6  |
| 7  | <b>757.34</b>  | <b>739.47</b>      | <b>740.34</b>     | 379.18 | F         | <b>625.64</b>  | <b>607.60</b>      | <b>609.00</b>     | 313.17 | 5  |
| 8  | 814.30         | <b>796.70</b>      | <b>796.70</b>     | 407.69 | G         | <b>478.36</b>  | 460.27             | <b>461.36</b>     | 239.64 | 4  |
| 9  | 961.44         | 943.48             | 944.43            | 481.23 | F         | <b>421.27</b>  | 403.25             | <b>404.09</b>     | 211.13 | 3  |
| 10 | <b>1060.49</b> | <b>1042.49</b>     | <b>1043.49</b>    | 530.76 | V         | <b>274.28</b>  | 256.18             | <b>257.21</b>     | 137.59 | 2  |
| 11 |                |                    |                   |        | R         | <b>175.35</b>  | 157.11             | 158.09            | 88.06  | 1  |

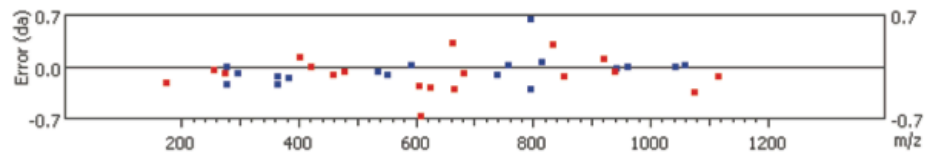

| # | b             | b-H <sub>2</sub> O | b-NH <sub>3</sub> | b (2+) | Seq       | y             | y-H <sub>2</sub> O | y-NH <sub>3</sub> | y (2+) | # |
|---|---------------|--------------------|-------------------|--------|-----------|---------------|--------------------|-------------------|--------|---|
| 1 | 171.04        | 153.10             | <b>154.20</b>     | 86.06  | K(+42.01) |               |                    |                   |        | 6 |
| 2 | <b>270.16</b> | 252.17             | <b>253.20</b>     | 135.59 | V         | <b>577.42</b> | <b>559.19</b>      | 560.32            | 289.17 | 5 |
| 3 | <b>417.29</b> | 399.41             | 400.22            | 209.13 | F         | <b>478.36</b> | <b>460.34</b>      | 461.25            | 239.64 | 4 |
| 4 | <b>516.29</b> | <b>498.42</b>      | <b>499.29</b>     | 258.66 | V         | <b>331.22</b> | <b>313.29</b>      | <b>314.05</b>     | 166.10 | 3 |
| 5 | <b>573.31</b> | 555.33             | 556.31            | 287.17 | G         | <b>232.28</b> | <b>214.09</b>      | <b>215.16</b>     | 116.57 | 2 |
| 6 |               |                    |                   |        | R         | <b>175.15</b> | <b>157.06</b>      | <b>158.13</b>     | 88.06  | 1 |

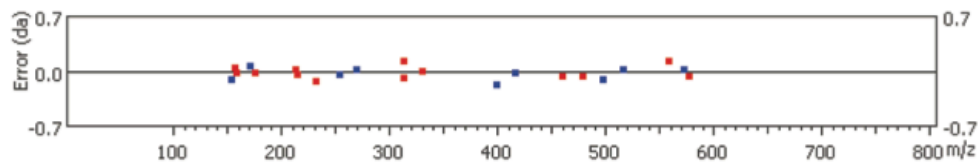

## Supplementary Figure 2: Ion scores from acetylated Lys-145 and Lys-192 peptides identified from mass spectrometry analysis

(a-b) Acetylated peptides were identified by mass spectrometry analysis from immunoprecipitated TDP-43- $\Delta$ NLS protein. Listed in the table are the ion scores that correspond to the m/z spectrums obtained. The numbers listed in red bold illustrate statistical significance and the presence of acetylation at Lys-145 (a) and Lys-192 (b). Mass spectrometry data were acquired with Xcaliber software (Thermo Fisher) and analyzed using PEAKS 6.0 (Bioinformatics Solutions Inc.) and Scaffold 3 software systems.

Supplementary Figure 5, Cohen *et al.*

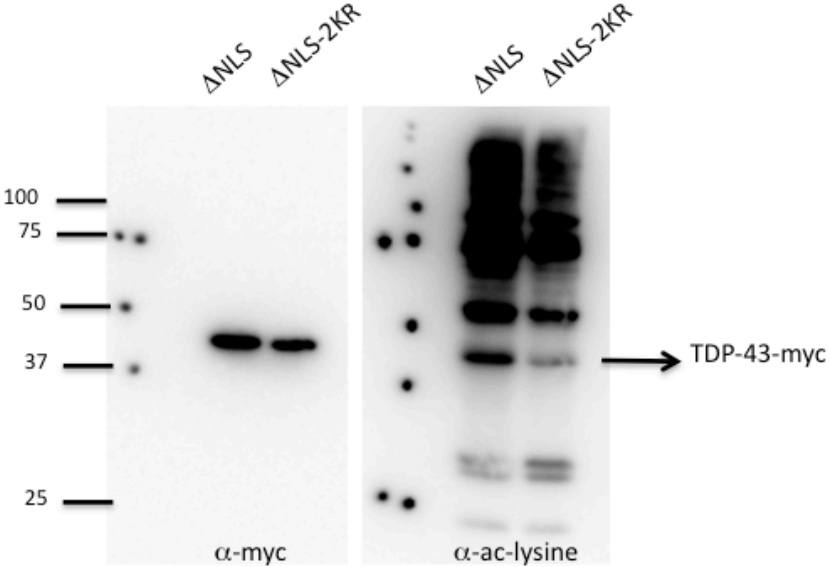

Supplementary Figure 6, Cohen *et al.*

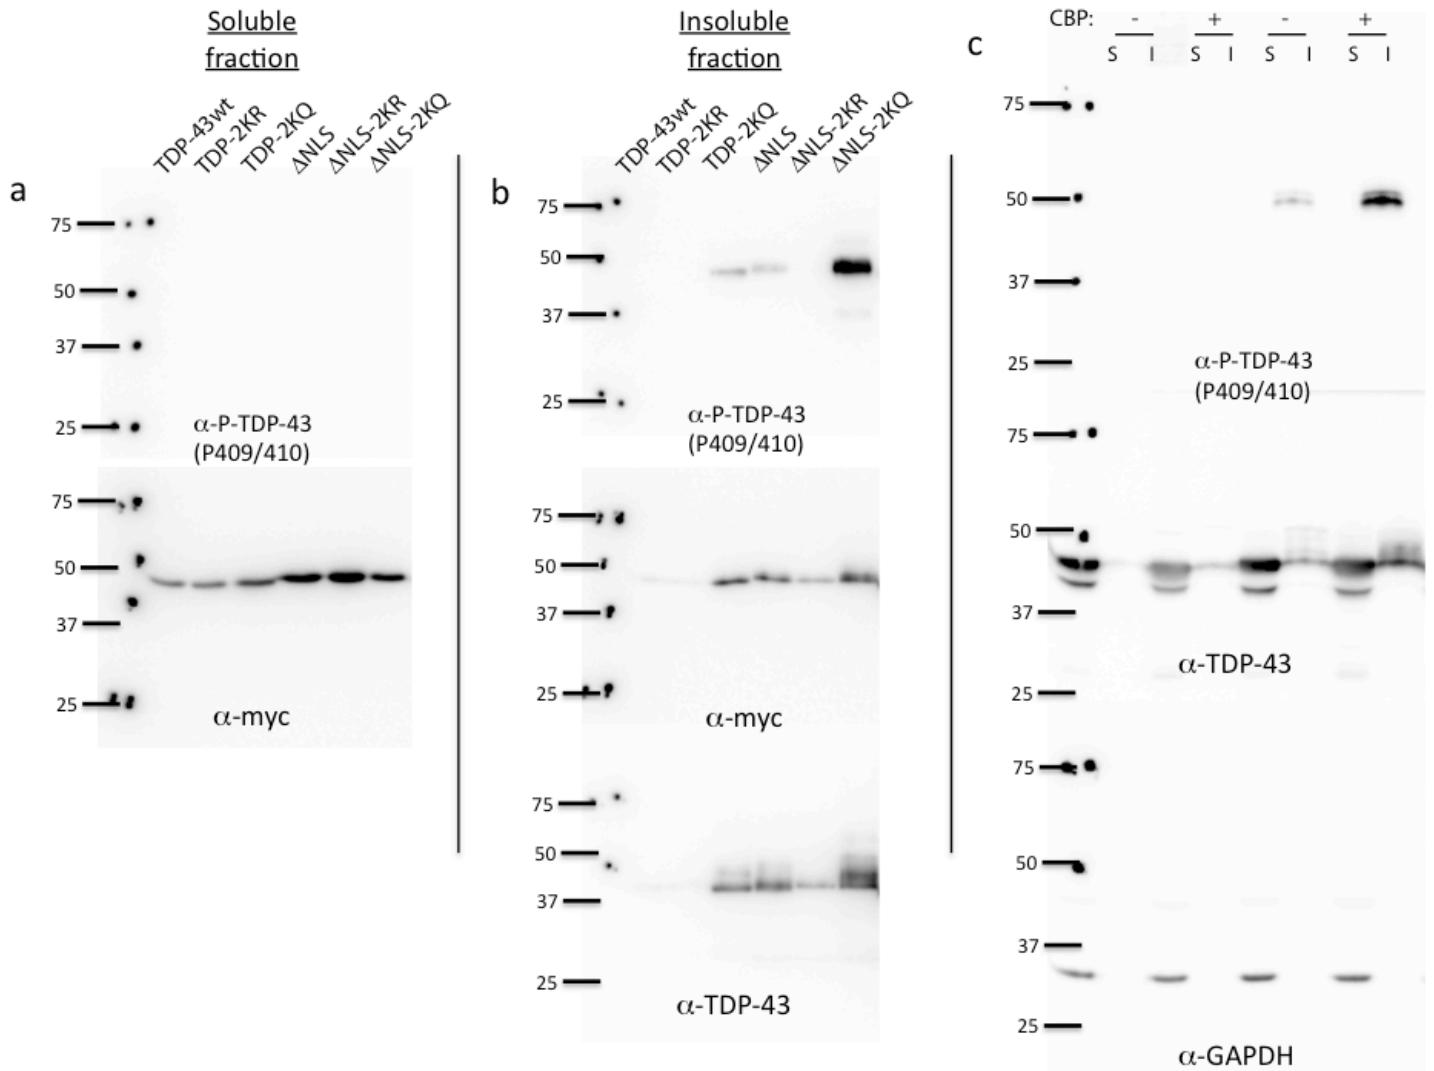

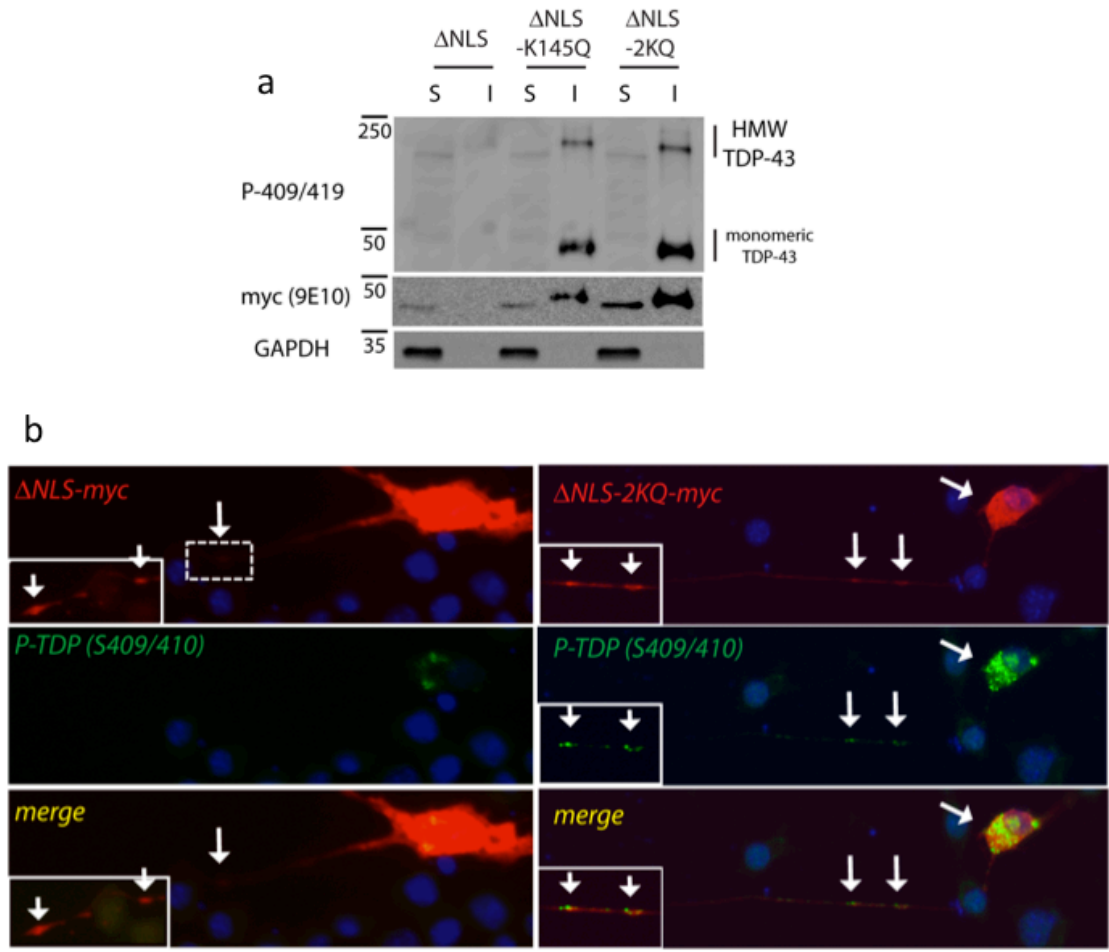

**Supplementary Figure 7: TDP-43 acetylation-mimics promote TDP-43 aggregation in differentiated Neuro2A cells**

Neuro2A cells were transfected with cytoplasmic TDP-43 (TDP-43- $\Delta$ NLS), or plasmids containing acetylation mimic mutations (TDP-43- $\Delta$ NLS-K145Q or TDP-43- $\Delta$ NLS-K145/192Q) for 48 hrs followed by differentiation by serum deprivation for an additional 24 hrs to extend neuritic processes. Soluble (S) and insoluble (I) cell lysates were analyzed by immunoblotting using P-409/410, myc (9E10), and GAPDH antibodies. b) Differentiated Neuro2A cells expressing non-acetylated TDP-43 (left panel) showed limited P-409/410 immunoreactivity within neurites (dashed box region is shown at higher exposure within inset to avoid image over-exposure). In contrast, the acetylation-mimic mutants (right panel), displayed strong accumulation of P-409/410-positive TDP-43 aggregates near the cell soma and distally within neurites. See white arrows highlighting transfected cells containing myc-positive TDP-43 aggregates in both soma and neurites.

Supplementary Figure 8, Cohen *et al.*

a

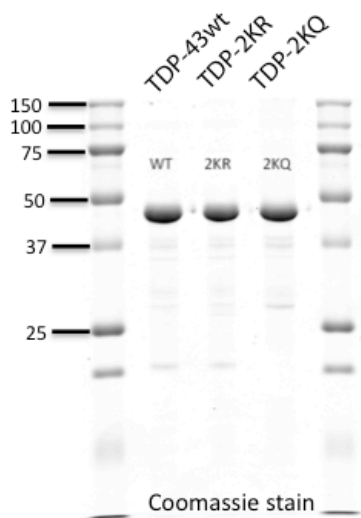

b

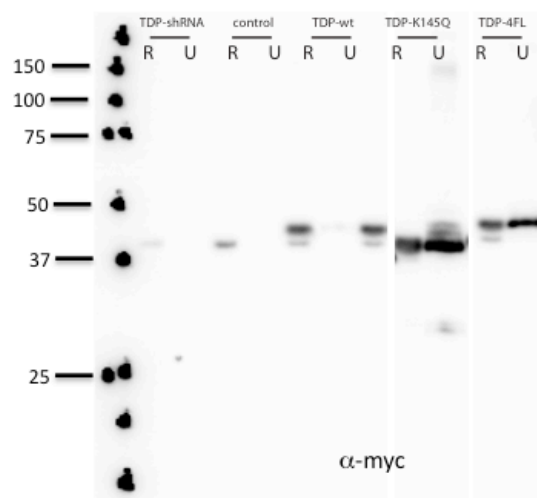

c

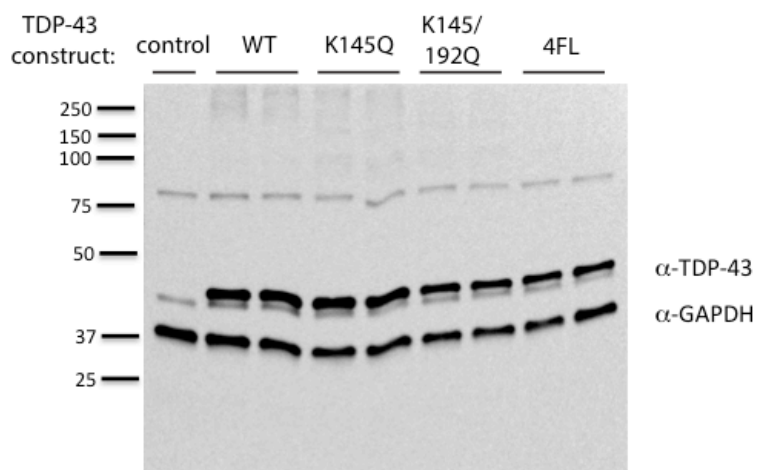



Supplementary Figure 9, Cohen *et al.*

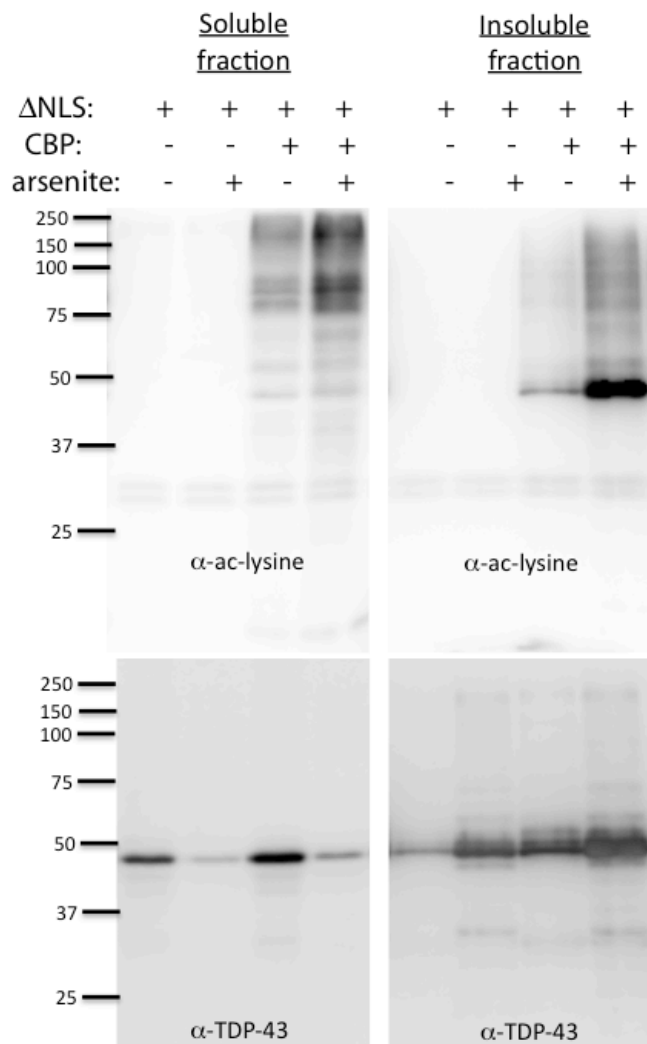

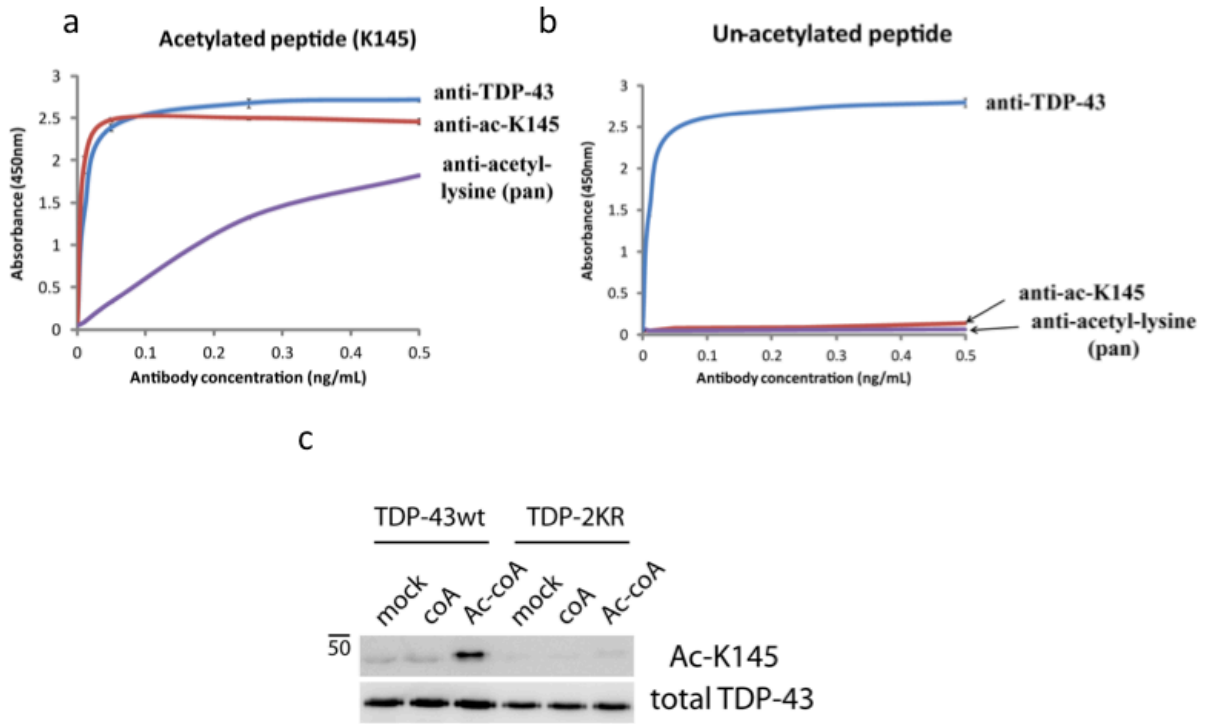

### Supplementary Figure 10: Characterization of an acetylated TDP-43 antibody (Ac-K145)

a-b) ELISA assays were performed with the indicated antibodies against chemically acetylated (a) or unmodified (b) Lys-145-containing peptides consisting of the following amino acid sequence: TGHSKGFGFVR. Shown is a representative ELISA assay from N=3 independent biological replicates, and error bars represent standard deviation (SD) among triplicate experimental samples. As shown, anti-acetyl-lysine and acetylated TDP-43 antibody (Ac-K145) specifically detected the Lys-K145 acetylated peptide, but not the unmodified peptide, indicating a site-specific acetylated TDP-43 antibody. c) Recombinant WT TDP-43 or TDP-2KR (K145/192R) proteins were incubated in an acetylation reaction lacking cofactor (mock), or containing 0.4 mM coenzyme A (coA) or acetyl coenzyme A (Ac-coA) in the presence of 0.5  $\mu$ g recombinant CBP for 1 hr at 37° followed by immunoblotting with Ac-K145. Acetylated WT TDP-43 protein was specifically detected by Ac-K145, while the TDP-2KR mutant protein showed diminished CBP-mediated acetylation.

Supplementary Figure 11, Cohen *et al.*

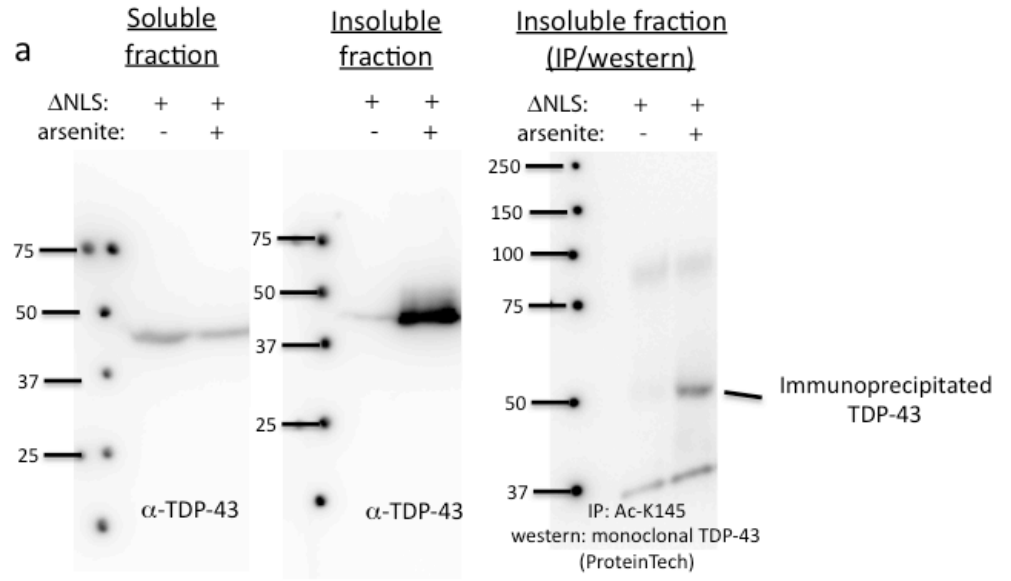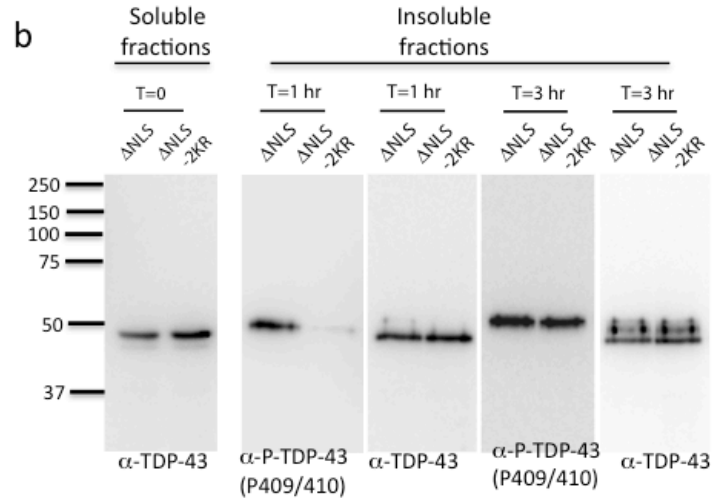

Supplementary Figure 12, Cohen *et al.*

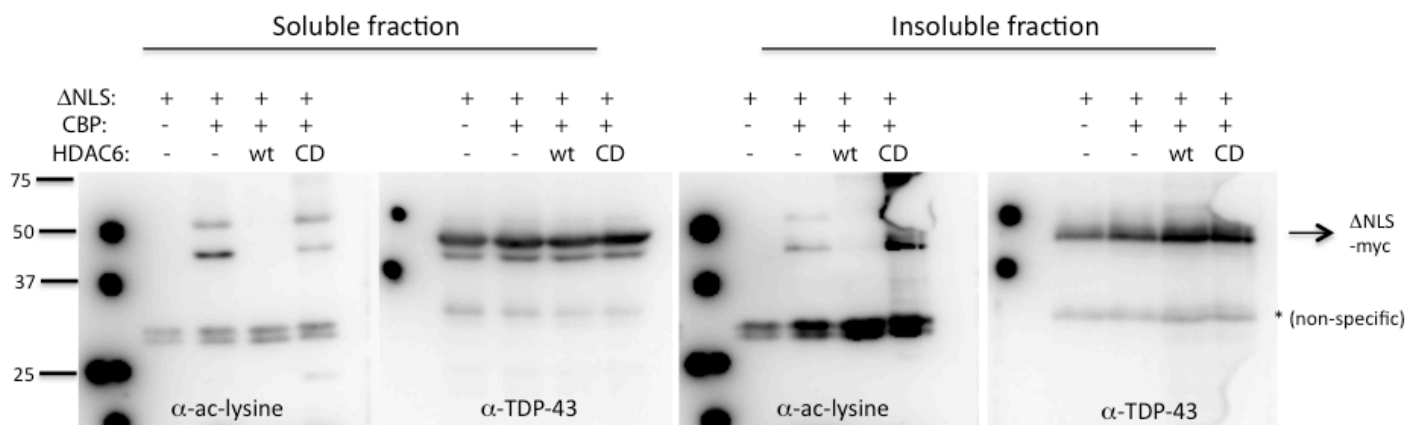

Supplementary Figure 13, Cohen *et al.*

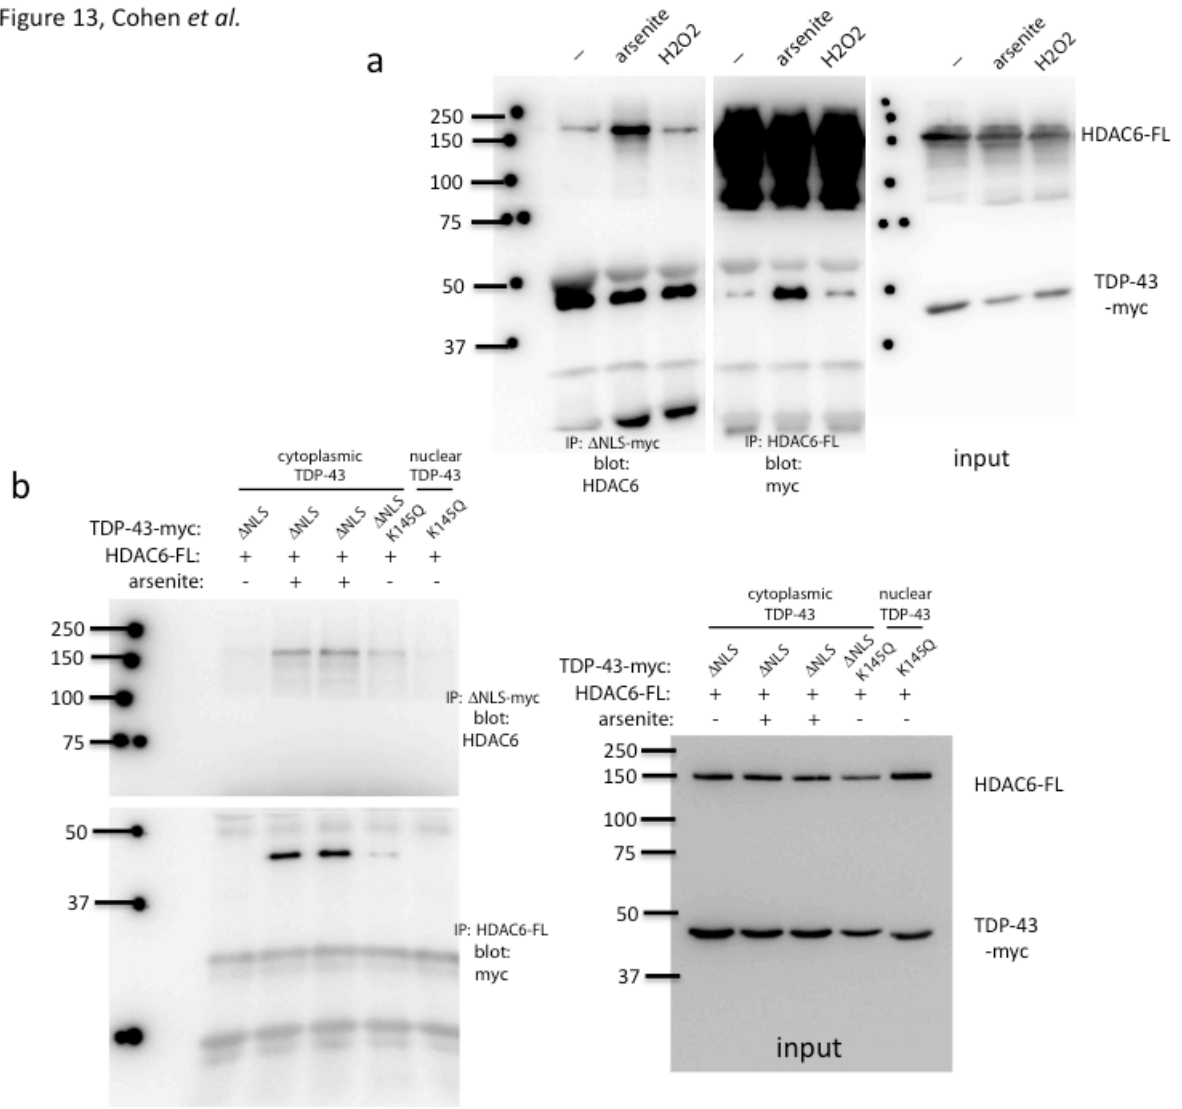

Supplementary Figure 14, Cohen *et al.*

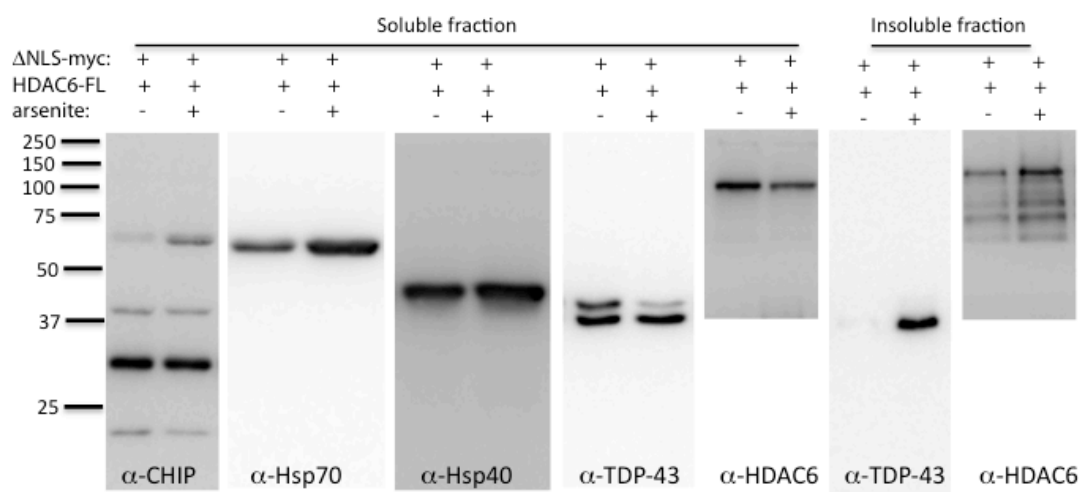

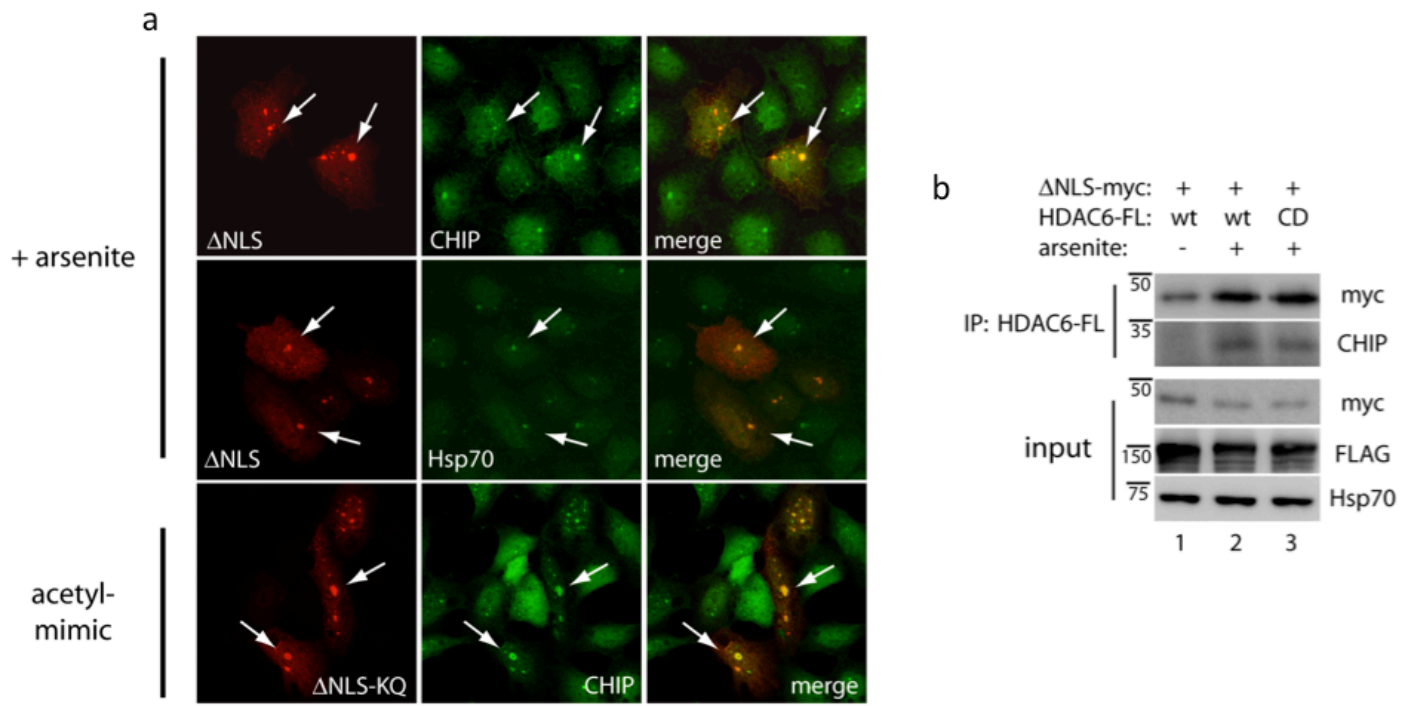

**Supplementary Figure 15: Acetylated TDP-43 aggregates recruit the CHIP/Hsp70 complex**

a) Double-labeling immunofluorescence microscopy illustrates that TDP-43 aggregates induced by either exposure to 0.2 mM arsenite for 1 hr (top rows) or acetylation-mimic mutations in the absence of stress (TDP-43- $\Delta$ NLS-K145Q, bottom row) are sufficient to recruit both CHIP and Hsp70 to cytoplasmic TDP-43 aggregated foci (see merged panels). Scale bar represents 25  $\mu$ m. b) HDAC6-FLAG was immunoprecipitated followed by detection of myc-tagged cytoplasmic TDP-43 (TDP-43- $\Delta$ NLS) or endogenous CHIP, indicating an arsenite-inducible interaction between HDAC6 and TDP-43 that is independent of HDAC6 catalytic activity (compare lanes 2 and 3) (CD=catalytically-dead).

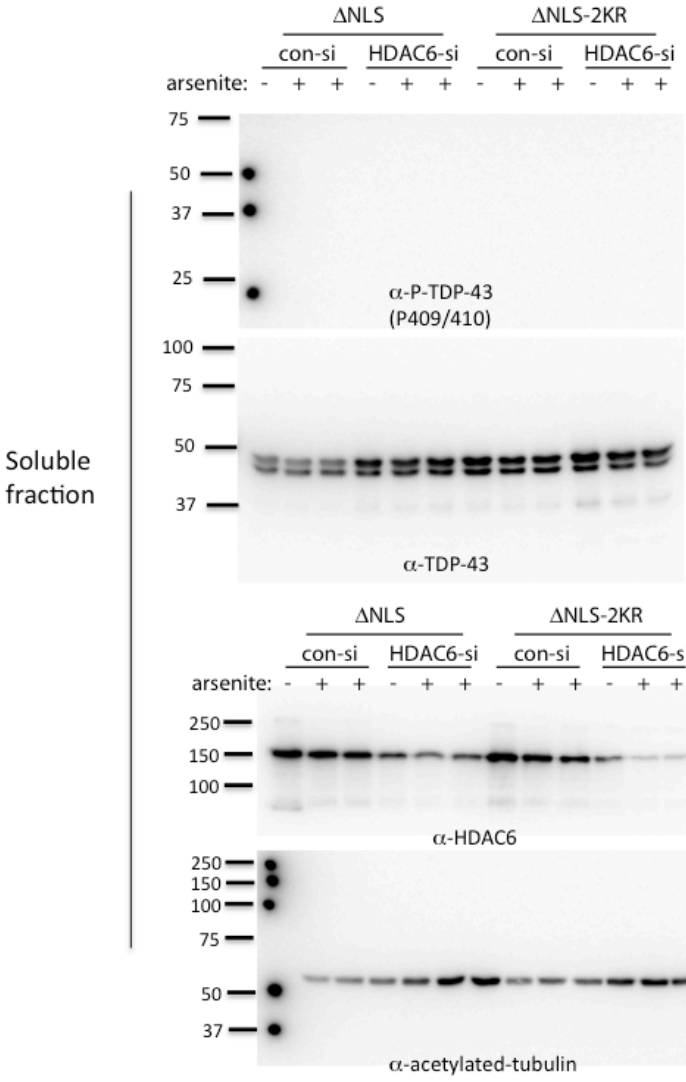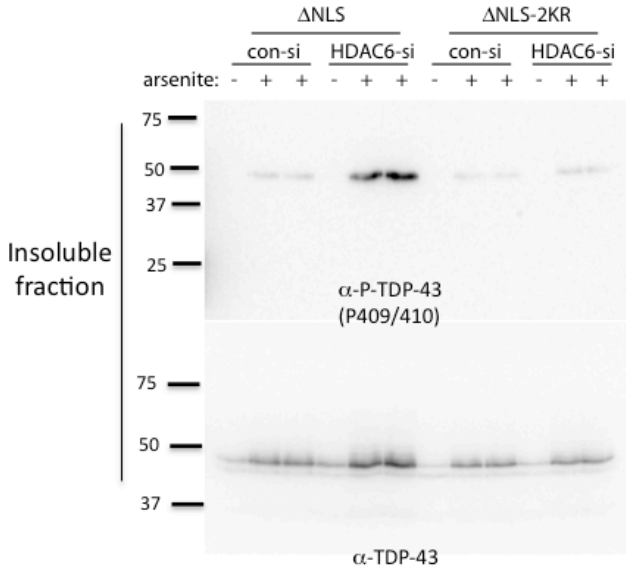

Supplement: NIHMS681434-supplement-Supp_1-16.pdf [file NIHMS681434-supplement-Supp_1-16.pdf]
